# Supplementary material for: PEDOT Composite with Ionic Liquid and Its Application to Deformable Electrochemical Transistors
Source: MDPI journal article supplement (doi:10.3390/gels8090534), 2022-08-25
Supplement: s1 [file s1]

# **PEDOT Composite with Ionic Liquid and Its Application to Deformable Electrochemical Transistors**

**Sangkyu Lee <sup>1,2,†</sup>, Jaepyo Jang <sup>1,2,†</sup>, Sungjun Lee <sup>3,4</sup>, Daekwang Jung <sup>1,2</sup>, Mikyung Shin <sup>2,5,6,\*</sup> and Donghee Son <sup>1,2,7,\*</sup>**

<sup>1</sup> Department of Electrical and Computer Engineering, Sungkyunkwan University (SKKU), Suwon 16419, Korea

<sup>2</sup> Center for Neuroscience Imaging Research, Institute for Basic Science (IBS), Suwon 16419, Korea

<sup>3</sup> Center for Bionics of Biomedical Research Institute, Korea Institute of Science and Technology, Seoul 02792, Korea

<sup>4</sup> School of Electrical and Electronic Engineering, Yonsei University, Seoul 03722, Korea

<sup>5</sup> Department of Intelligent Precision Healthcare Convergence, Sungkyunkwan University (SKKU), Suwon 16419, Korea

<sup>6</sup> Department of Biomedical Engineering, Sungkyunkwan University (SKKU), Suwon 16419, Korea

<sup>7</sup> Department of Superintelligence Engineering, Sungkyunkwan University (SKKU), Suwon 16419, Korea

\* Correspondence: mikyungshin@g.skku.edu (M.S.); daniel3600@g.skku.edu (D.S)

†These authors contributed equally to this work.

Supplementary Figures S1–S8, Table S1.

Supplementary Figure S1

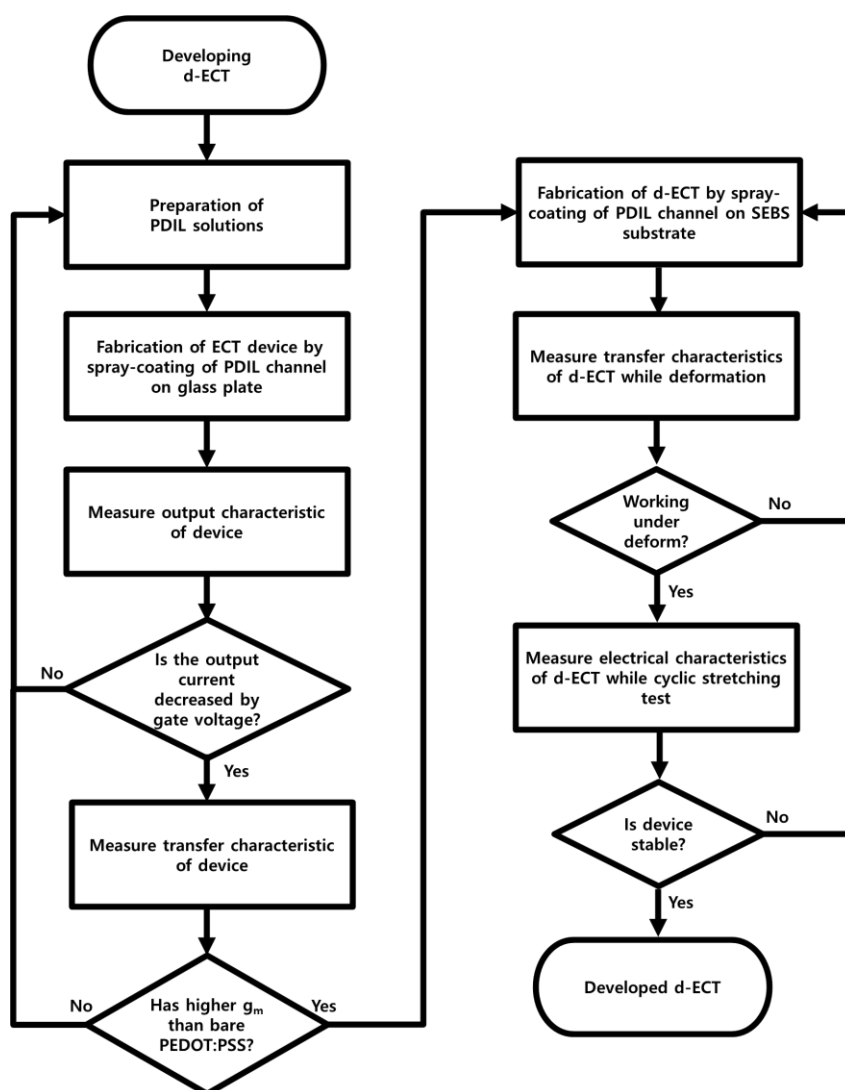

Supplementary Figure S1. Flowchart about the tests and characterizations for development of d-ECT devices.

## Supplementary Figure S2

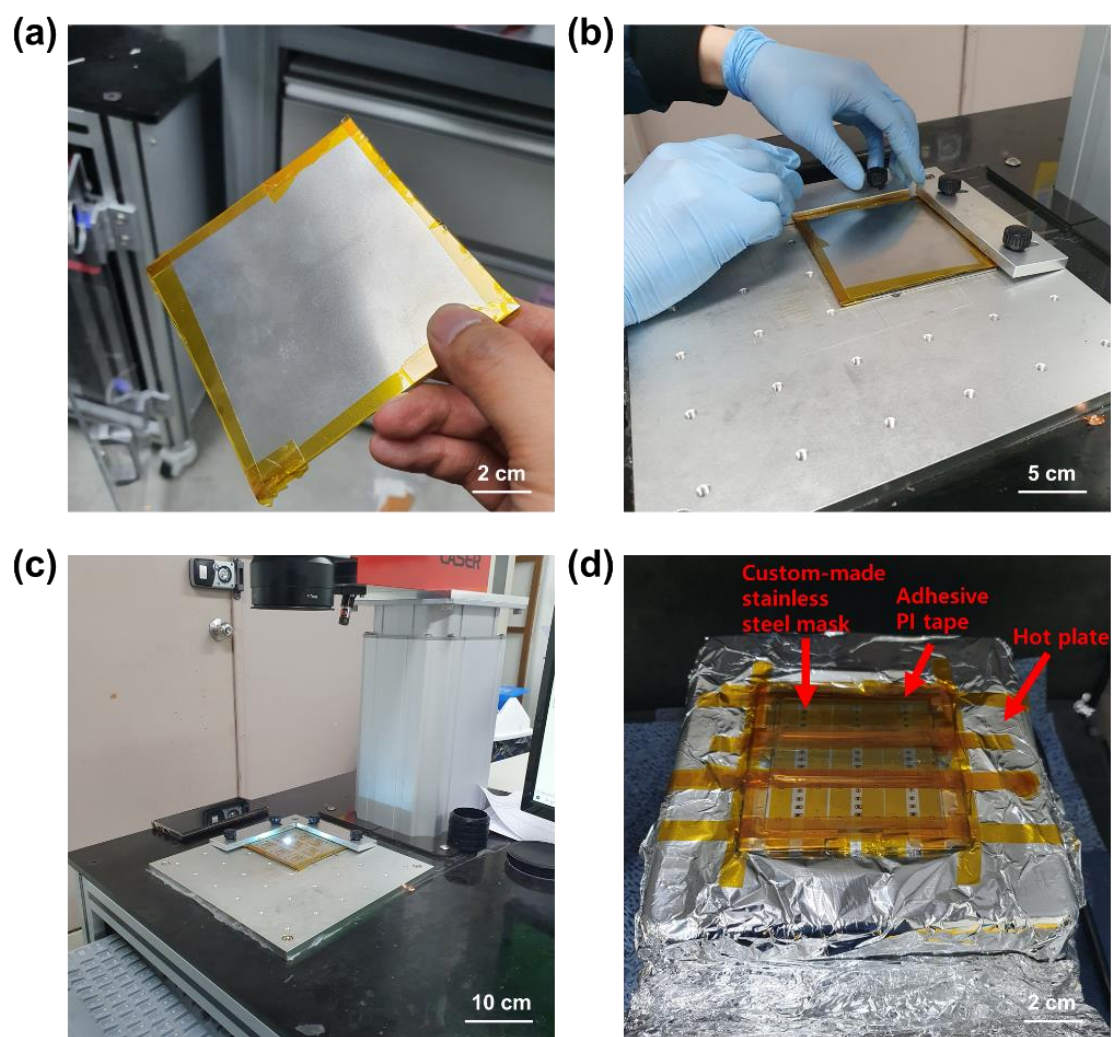

**Supplementary Figure S2. Shadow mask preparation and spray-coating environment using custom-masked shadow mask for channel deposition.** (a) Preparation of stain-less steel plate. (b) Fixation of plate on stage of laser-patterning equipment. (c) Laser-patterning process. (d) Spray-coating conditions.

Supplementary Figure S3

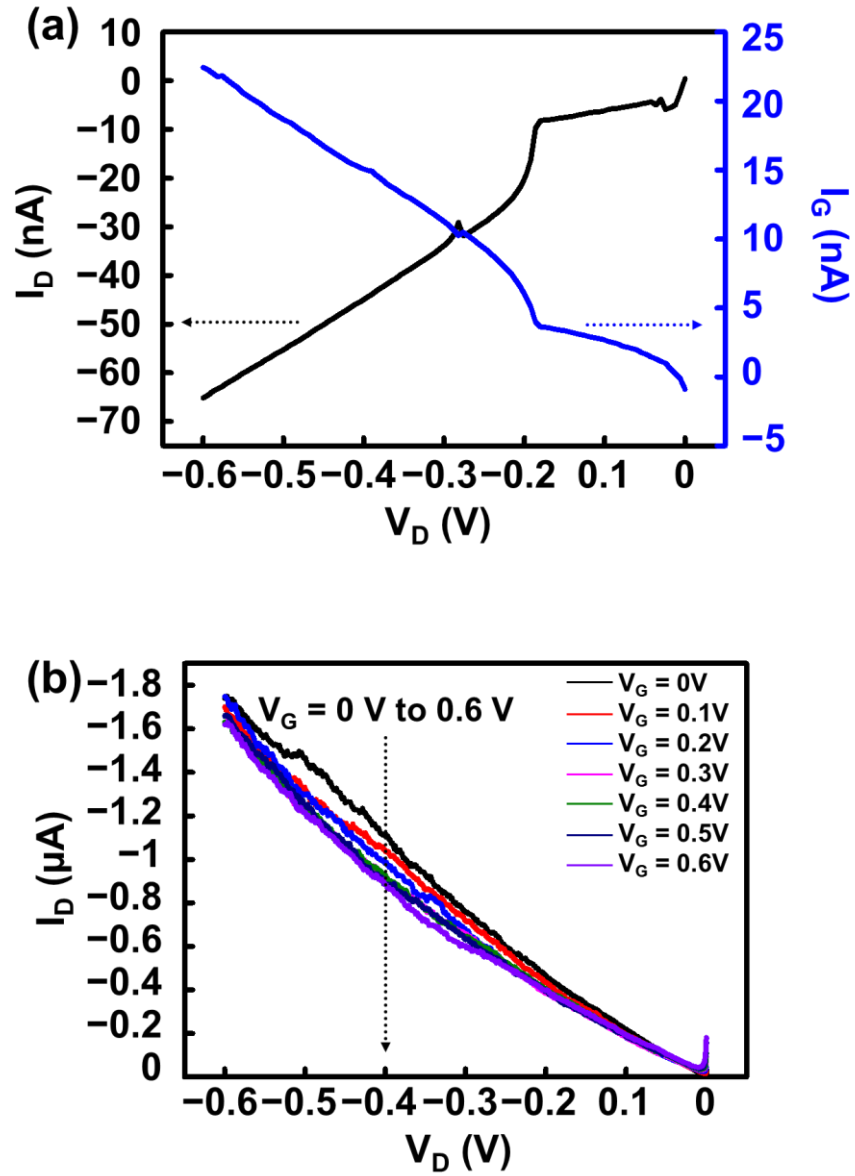

**Supplementary Figure S3. No encapsulation effect on ECT characteristics on glass plate.** (a) gate-drain short caused by no encapsulation of ECT. (b) transfer characteristics of ECT without encapsulation. Gate voltage could not influence the conductivity of channel (Electrochemical doping-dedoping process of PEDOT:PSS was not caused).

## Supplementary Figure S4

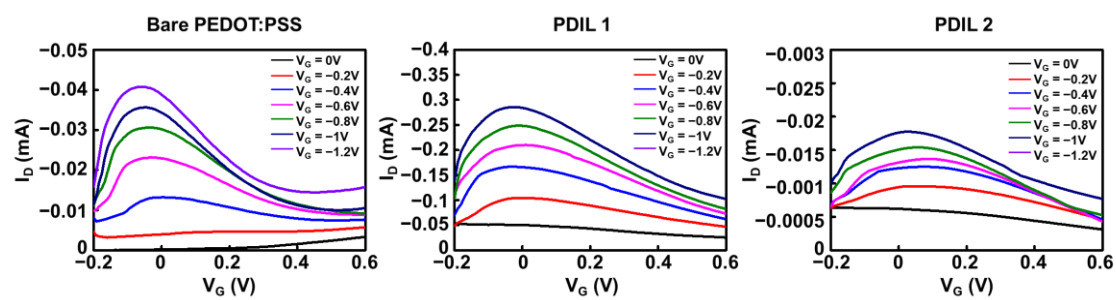

**Supplementary Figure S4.** Transfer characteristics of ECTs on glass plate for comparison of each PDIL channel.

Supplementary Figure S5

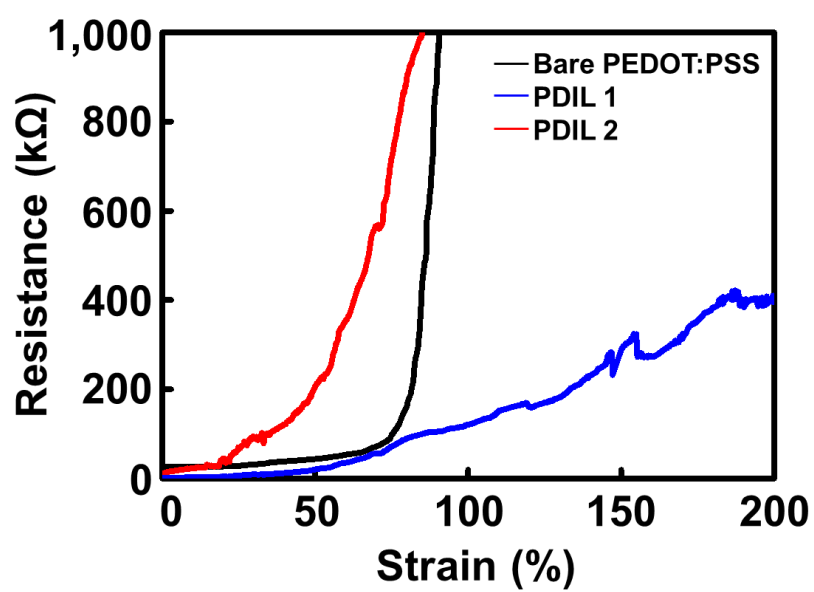

Supplementary Figure S5. Continuous stretching test of each channel material (Bare PEDOT:PSS, PDIL 1 and 2) on SEBS.

Supplementary Figure S6

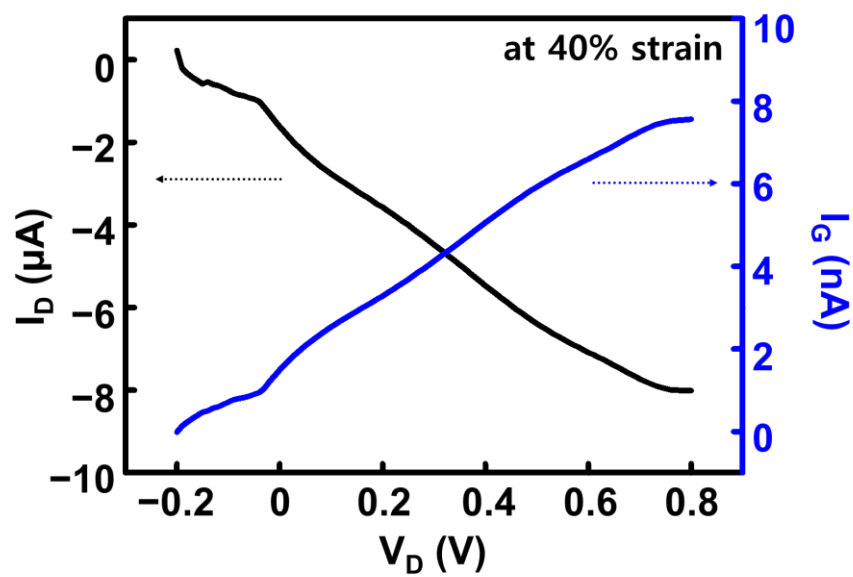

Supplementary Figure S6. Transfer characteristics of d-ECT using PBS solution electrolyte at stretching 40%.

Supplementary Figure S7

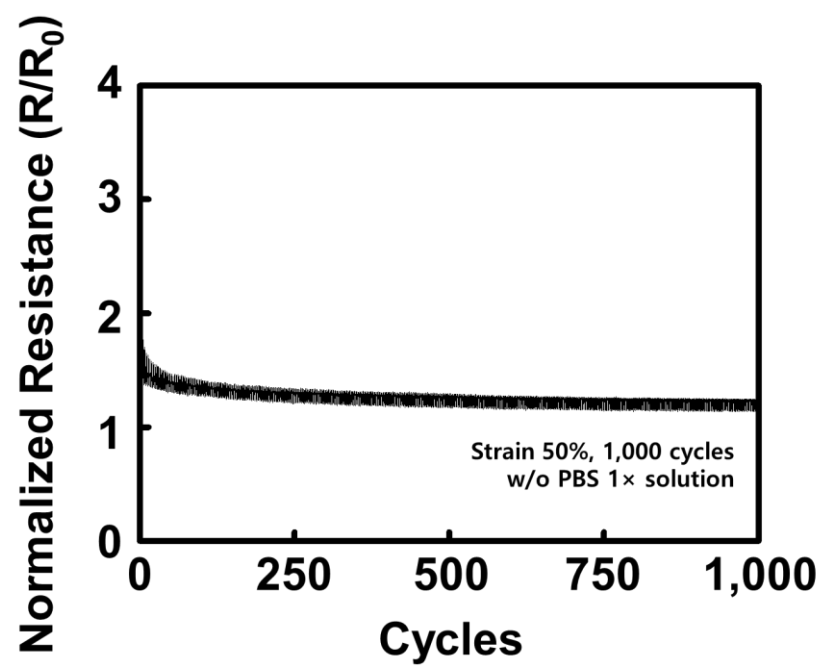

Supplementary Figure S7. Cyclic stretching test of d-ECT without liquid electrolyte during 1,000 cycles of 50% strain.



## Supplementary Figure S8

### 1. Pristine (0 %)

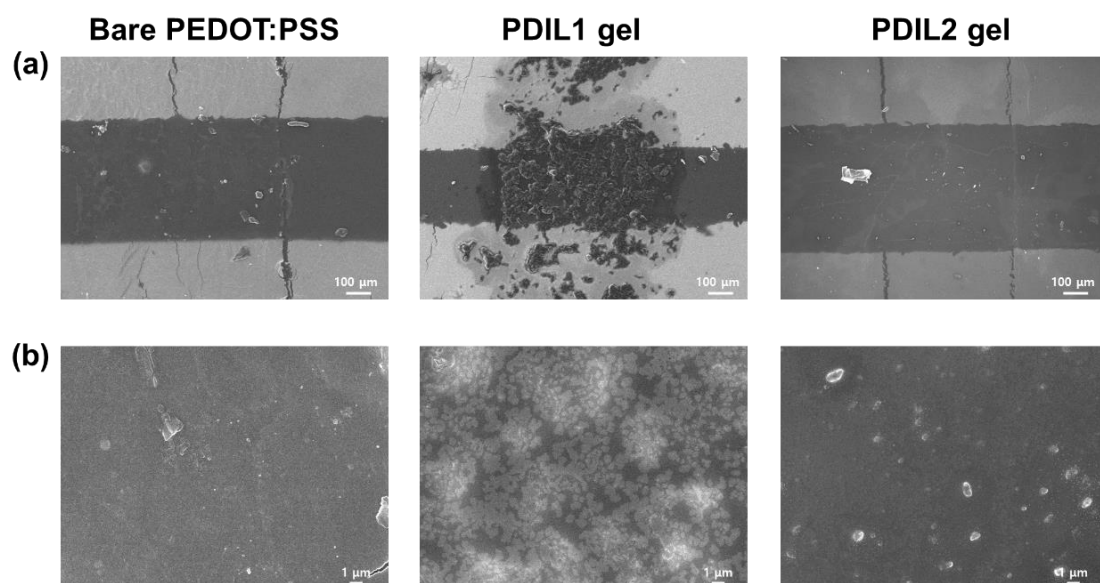

### 2. Stretched (30%)

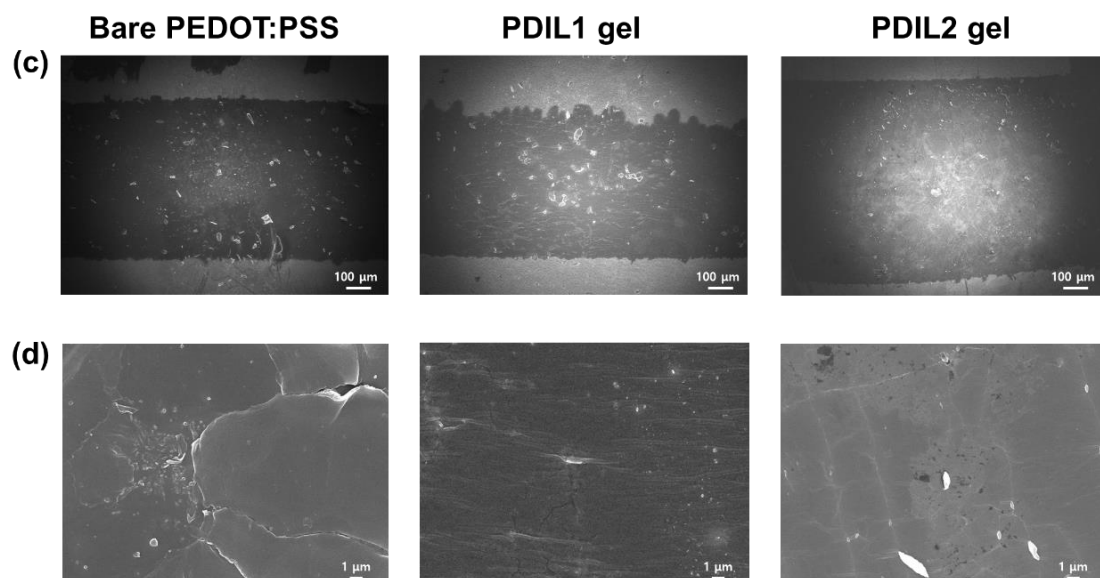

**Supplementary Figure S8.** Scanning electron microscopy (SEM) of PDIL channels on d-ECT when they were pristine and 30% stretched.

**Supplementary Table S1**

|                       | Reference         | Channel                         | Electrode                                      | Max transconductance (mS) | * Normalized Transconductance (S/cm <sup>-1</sup> ) | Stretchability (%)      |
|-----------------------|-------------------|---------------------------------|------------------------------------------------|---------------------------|-----------------------------------------------------|-------------------------|
| Extrinsic stretchable | Marchiori et al.  | PEDOT : PSS                     | Au                                             | 6.5                       | NA                                                  | 38                      |
|                       | Lee et al.        | PEDOT : PSS                     | Au                                             | 1                         | NA                                                  | 15                      |
|                       | Zhang et al.      | PEDOT : PSS                     | Au                                             | 0.6                       | NA                                                  | 30                      |
| Intrinsic stretchable | Dai et al.        | P(g2T-t)                        | Vertical Au nanowires (Au NW)                  | NA                        | 223                                                 | 100                     |
|                       | Bontapalle et al. | PEDOT : PSS                     | Au nanomembrane (Au NM, on S,D) /Carbon (Gate) | NA                        | 56                                                  | 30                      |
|                       | Li et al.         | PEDOT : PSS                     | Au NM (S,D) /Carbon (Gate)                     | NA                        | 13                                                  | 45                      |
|                       | Chen et al.       | DPP-g2T                         | Au                                             | NA                        | 15.83                                               | 140                     |
|                       | <b>This work</b>  | <b>PEDOT : PSS-Ionic liquid</b> | <b>Au NM</b>                                   | <b>0.3</b>                | <b>1.25</b>                                         | <b>30 (without PBS)</b> |

**Supplementary Material Reference:**

1. Marchiori, B.; Delattre, R.; Hannah, S.; Blayac, S.; Ramuz, M. Laser-Patterned Metallic Interconnections for All Stretchable Organic Electrochemical Transistors. *Sci. Rep.* **2018**, *8*, 8477.
2. Lee, W.; Kobayashi, S.; Nagase, M.; Jimbo, Y.; Saito, I.; Inoue, Y.; Yambe, T.; Sekino, M.; Malliaras, G.G.; Yokota, T.; et al. Nonthrombogenic, Stretchable, Active Multielectrode Array for Electroanatomical Mapping. *Sci. Adv.* **2018**, *4*, eaau2426.
3. Zhang, S.; Hubis, E.; Tomasello, G.; Soliveri, G.; Kumar, P.; Cicoira, F. Patterning of Stretchable Organic Electrochemical Transistors. *Chem. Mater.* **2017**, *29*, 3126–3132.
4. Dai, Y.; Dai, S.; Li, N.; Li, Y.; Moser, M.; Strzalka, J.; Prominski, A.; Liu, Y.; Zhang, Q.; Li, S.; et al. Stretchable Redox-Active Semiconducting Polymers for High-Performance Organic Electrochemical Transistors. *Adv. Mater.* **2022**, *34*, 2201178.
5. Bontapalle, S.; Na, M.; Park, H.; Sim, K. Fully Soft Organic Electrochemical Transistor Enabling Direct Skin-Mountable Electrophysiological Signal Amplification. *Chem. Commun.* **2022**, *58*, 1298–1301.
6. Li, Y.; Zhang, S.; Li, X.; Unnava, V.R.N.; Cicoira, F. Highly Stretchable PEDOT: PSS Organic Electrochemical Transistors Achieved via Polyethylene Glycol Addition. *Flex. Print. Electron.* **2019**, *4*, 44004.
7. Chen, J.; Huang, W.; Zheng, D.; Xie, Z.; Zhuang, X.; Zhao, D.; Chen, Y.; Su, N.; Chen, H.; Pankow, R.M.; et al. Highly Stretchable Organic Electrochemical Transistors with Strain-Resistant Performance. *Nat. Mater.* **2022**, *21*, 564–571.
